# Supplementary material
Source: Royal Society of Chemistry journal article supplement (doi:10.1039/d6ay00547k)
Supplement: d6ay00547k1.pdf [file d6ay00547k1.pdf]

1

## Supplementary Information

### 2 **Chemical derivatization of citrullinated peptides using methylglyoxal** 3 **and sodium 3-mercaptopropanesulfonate (MG/MPS)**

4 Yunxia Wang<sup>a,1</sup>, Juanjuan Zhao<sup>b,1</sup>, Shan Zhang<sup>a</sup>, Ying Wang<sup>a</sup>, Zhibo Jin<sup>a</sup>, Xingtai Qiu<sup>c</sup>,  
5 Zichao Tang<sup>c</sup>, Nan Deng<sup>d\*</sup>, Yangyang Bian<sup>a\*</sup>

6 a Key Laboratory of Resource Biology and Modern Biotechnology in Western China,  
7 College of Life Science, Northwest University, Xi'an, Shaanxi Province 710069, P.R.  
8 China.

9 b Department of Pharmacy, General Hospital of Ningxia Medical University, No.804  
10 Shengli South Street, Yinchuan, Ningxia, 750004, PR China.

11 c Xiamen Jinnuohua Biotechnology Co., Ltd., Xiamen, Fujian, 361000, P.R. China.

12 d Instrumental Analysis Center, Xi'an Jiaotong University, Xi'an, Shaanxi Province  
13 710049, P.R. China.

14 \* Corresponding authors.

15 E-mail addresses: [dengnan@xjtu.edu.cn](mailto:dengnan@xjtu.edu.cn), [bianyy@nwu.edu.cn](mailto:bianyy@nwu.edu.cn)

16 <sup>1</sup> These authors contributed equally to this work.

17 **Figures**

18 **Figure S1.**

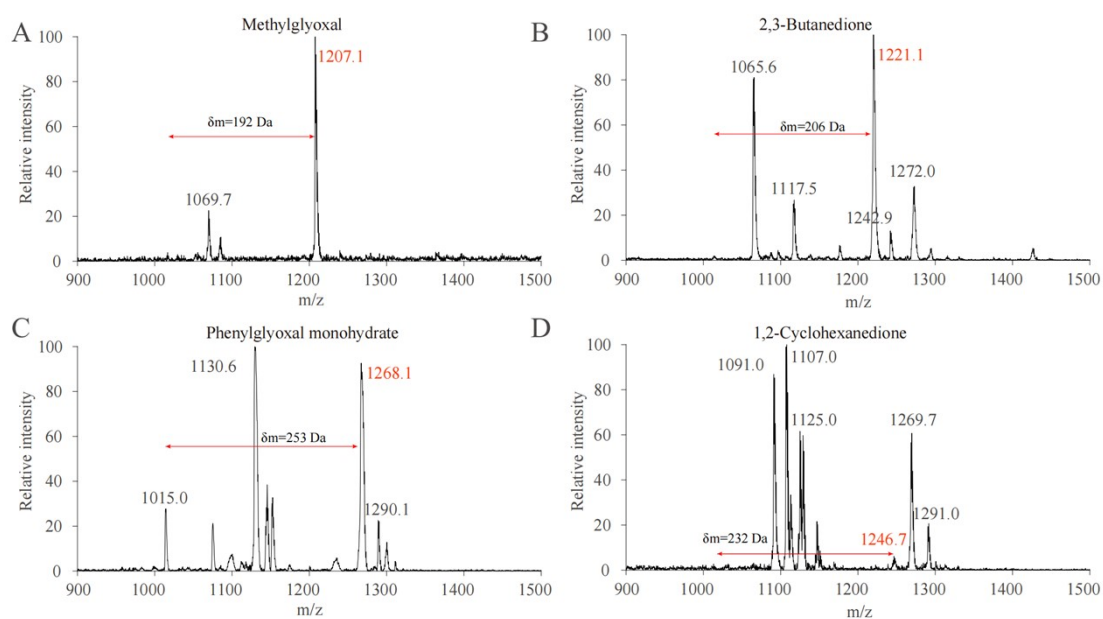

19

20 Figure S1. MALDI-TOF MS spectrum of the standard citrullinated peptide PL-Cit-

21 AASPF<sub>R</sub> after derivatization with different dicarbonyl compounds and sodium 3-

22 mercaptopropanesulfonate. (A) methylglyoxal, (B) 2,3-butanedione, (C) phenylglyoxal

23 monohydrate, (D) 1,2-cyclohexanedione.

24 Figure S2.

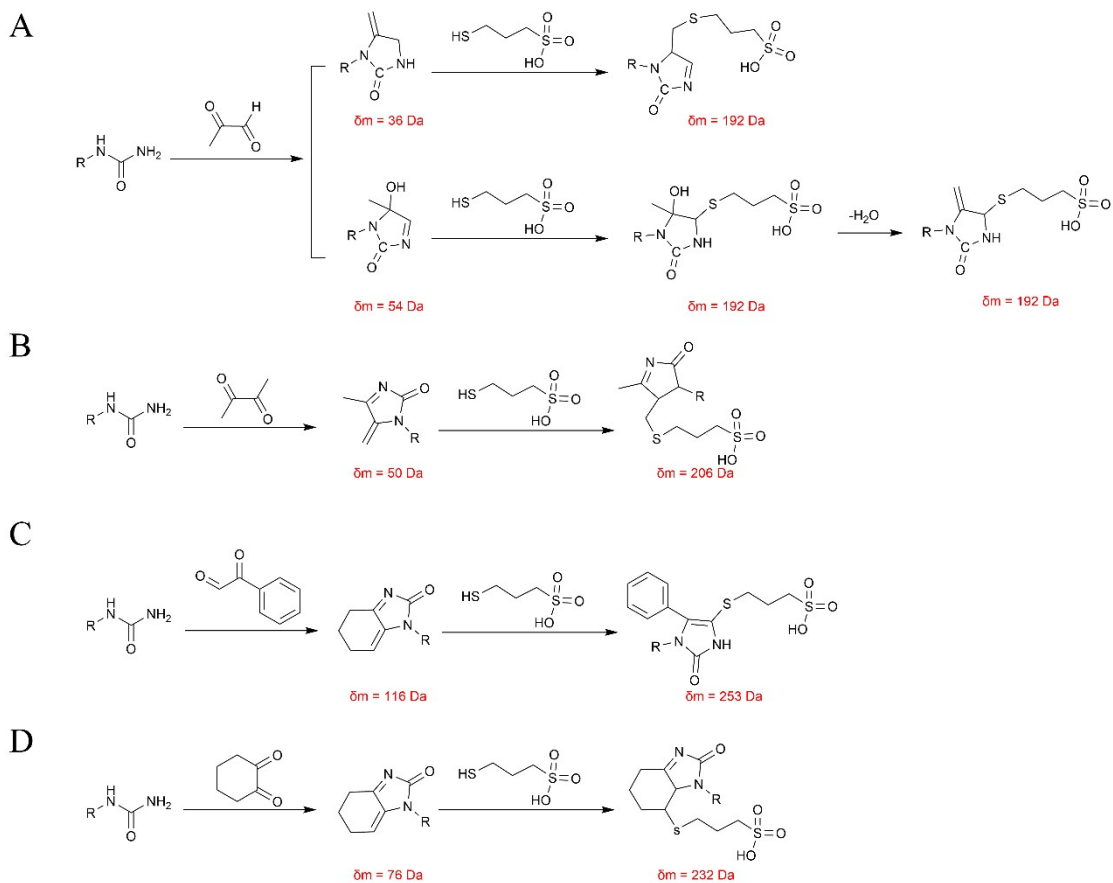

25

26 Figure S2. Reaction mechanism diagram of the standard peptide with different  
27 dicarbonyl compounds and sodium 3-mercaptopropanesulfonate. (A) methylglyoxal,  
28 (B) 2,3-butanedione, (C) phenylglyoxal monohydrate, (D) 1,2-cyclohexanedione.

29 Figure S3.

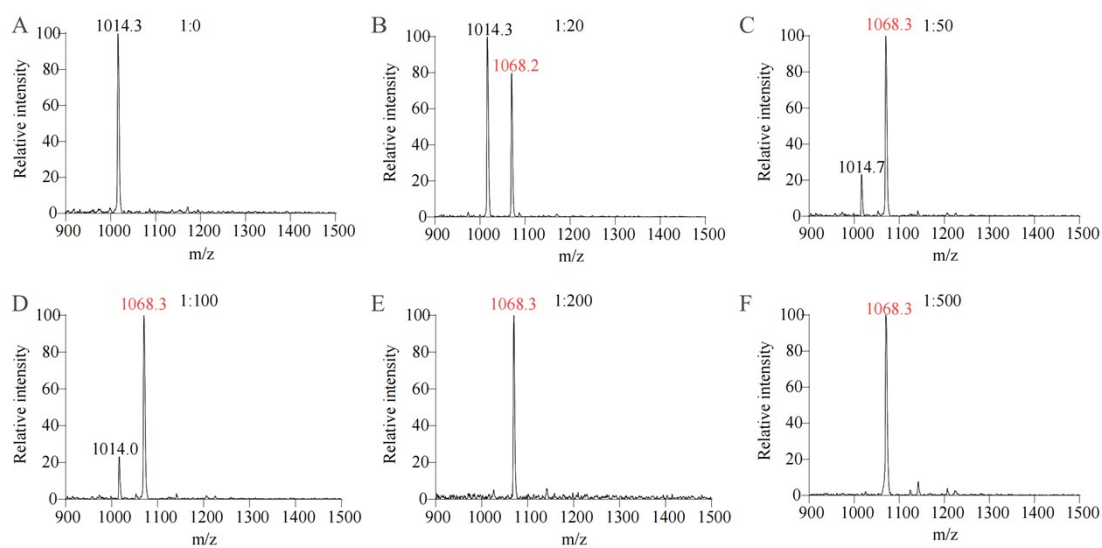

30

31 Figure S3. MALDI-TOF MS spectrum of the standard citrullinated peptide PL-Cit-  
32 AASPF<sub>R</sub> after derivatization with different ratios of methylglyoxal. (A) 1:0, (B) 1:20,  
33 (C) 1:50, (D) 1:100, (E) 1:200, (F) 1:500.

34 Figure S4.

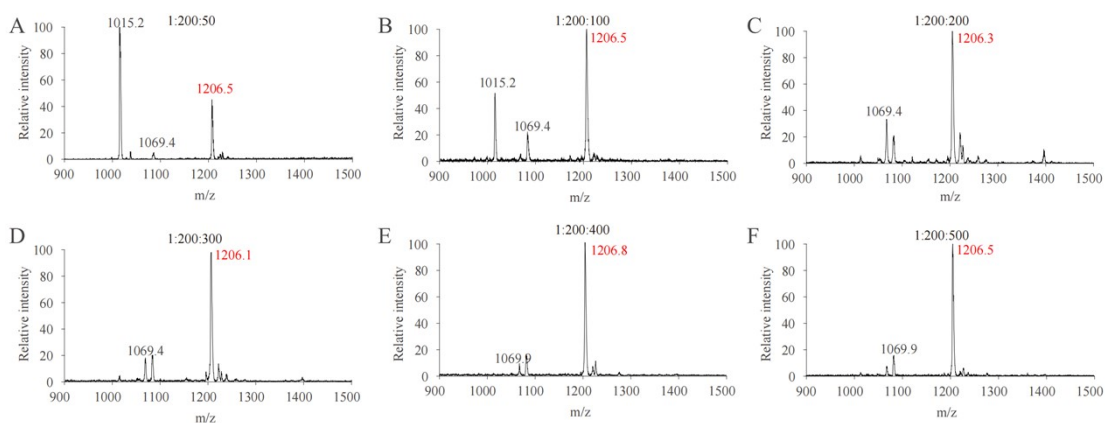

35

36 Figure S4. MALDI-TOF MS spectrum of the standard citrullinated peptide PL-Cit-

37 AASPFR after derivatization with methylglyoxal and different ratios of sodium 3-

38 mercaptopropanesulfonate. (A) 1:200:50, (B) 1:200:100, (C) 1:200:200, (D) 1:200:300,

39 (E)

1:200:400,

(F)

1:200:500.

40 Figure S5

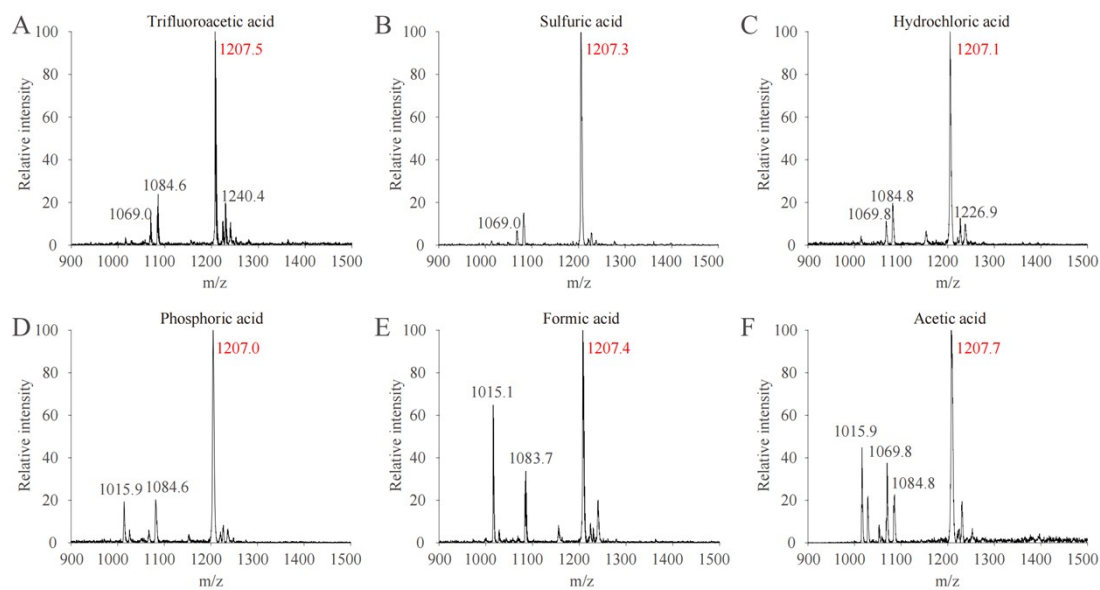

41

42 Figure S5. MALDI-TOF MS spectrum of the standard citrullinated peptide PL-Cit-  
43 AASPFR after derivatization with methylglyoxal, sodium 3-  
44 mercaptopropanesulfonate, and different types of acids. (A) 10% trifluoroacetic acid,  
45 (B) 10% sulfuric acid, (C) 10% hydrochloric acid, (D) 10% phosphoric acid, (E) 10%  
46 formic acid, (F) 10% acetic acid.

47 Figure S6.

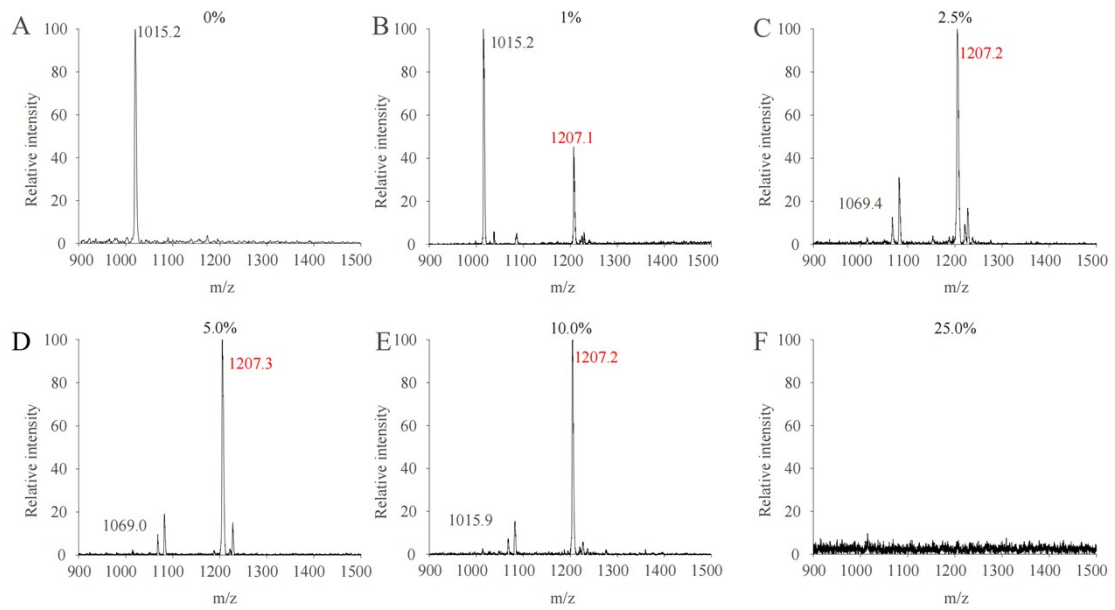

48

49 Figure S6. MALDI-TOF MS spectrum of the standard peptide PL-Cit-AASPFR after  
50 derivatization with methylglyoxal, sodium 3-mercaptopropanesulfonate, and different  
51 concentrations of sulfuric acid. (A) 0%, (B) 1%, (C) 2.5%, (D) 5.0%, (E) 10.0%, (F)  
52 25.0%.

53 Figure S7.

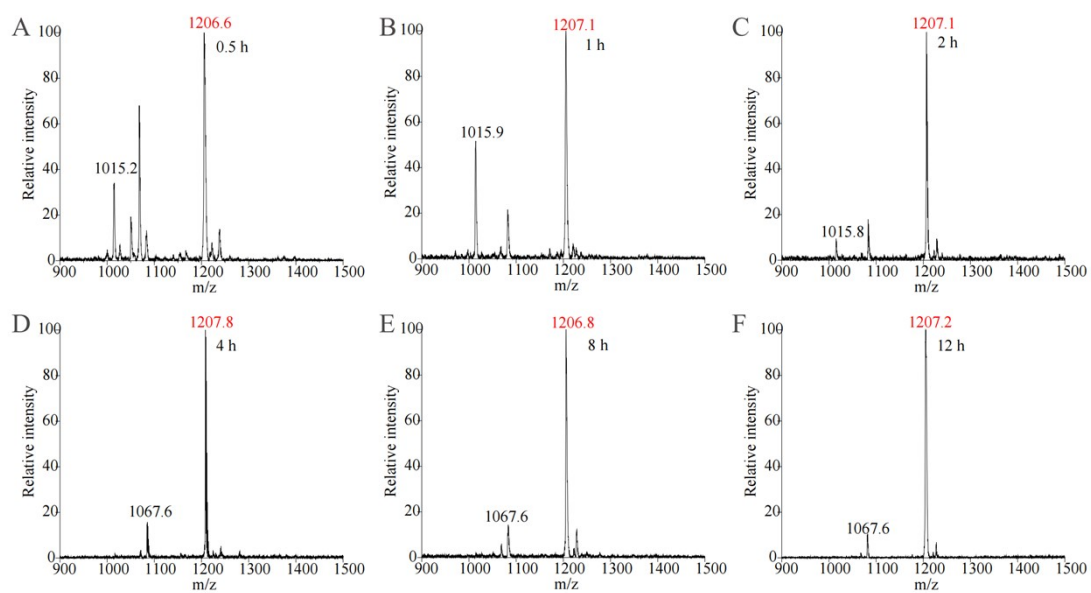

54

55 Figure S7. MALDI-TOF MS spectrum of the standard peptide PL-Cit-AASPFR after  
56 derivatization with methylglyoxal and sodium 3-mercaptopropanesulfonate at different  
57 reaction times. (A) 0.5 h, (B) 1 h, (C) 2 h, (D) 4 h, (E) 8 h, (F) 10 h.

58 Figure S8.

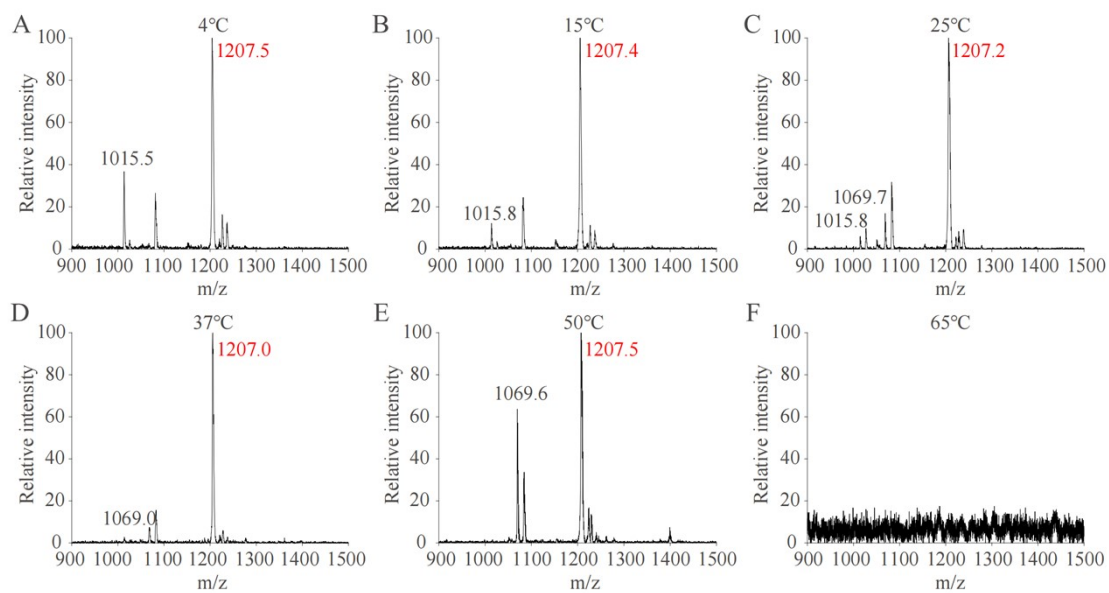

59

60 Figure S8. MALDI-TOF MS spectrum of the standard peptide PL-Cit-AASPFR after  
61 derivatization with methylglyoxal and sodium 3-mercaptopropanesulfonate at different  
62 reaction temperatures. (A) 4°C, (B) 15°C, (C) 25°C, (D) 37°C, (E) 50°C, (F) 65°C.

63 Figure S9.

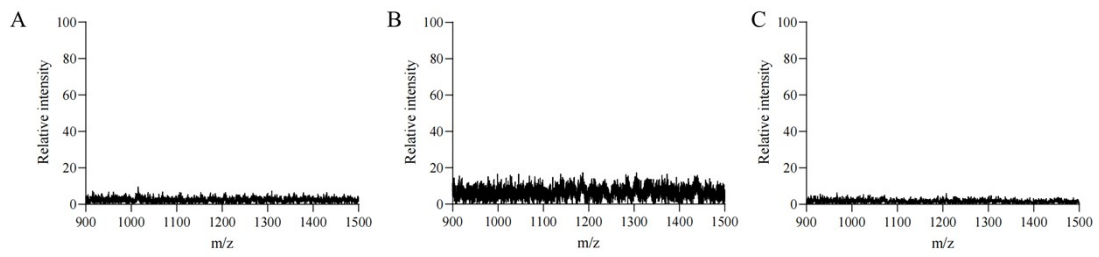

64

65 Figure S9. MALDI-TOF MS spectrum of three independent replicate experiments for  
66 the standard peptide PL-Cit-AASPFYR after derivatization with methylglyoxal and  
67 sodium 3-mercaptopropanesulfonate at 65°C. (A, B, C) Results of three independent  
68 replicate experiments, respectively.

69 Figure S10.

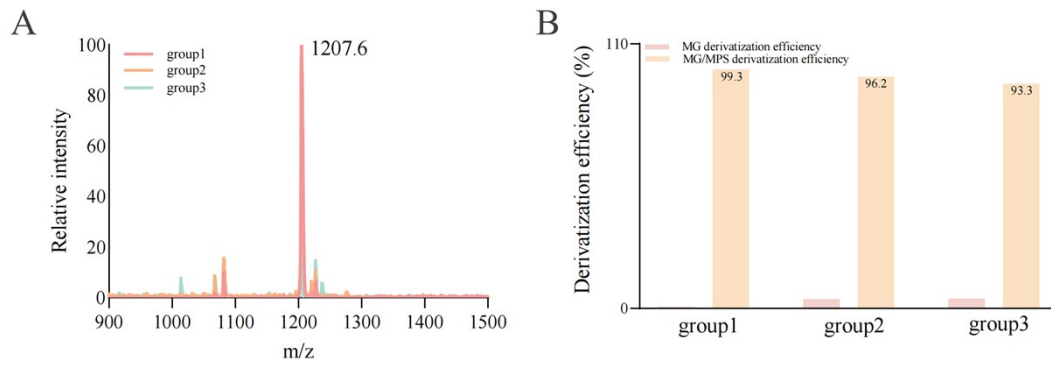

70

71 Figure S10. Validation of derivatization efficiency and reproducibility of the MG/MPS  
72 derivatization strategy using the citrullinated peptide PL-Cit-AASPFR. Derivatization  
73 was performed as described in the workflow section (see materials and methods for  
74 details). (A) Overlaid MALDI-TOF MS spectra of the derivatized citrullinated peptide  
75 from three parallel experiments. (B) Bar graph showing the derivatization efficiency of  
76 the MG/MPS strategy across three independent experiments.

77 Figure S11.

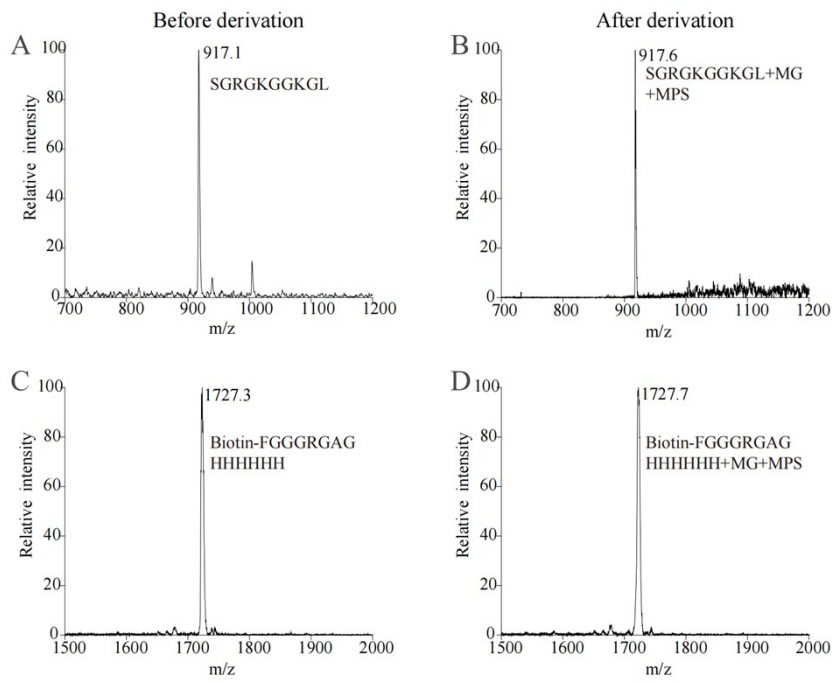

78

79 Figure S11. MALDI-TOF MS spectrum of two arginine-containing peptides  
80 SGRGKGGKGL and Biotin-FGGGRGAGHHHHHH before (A, C) and after (B, D)  
81 methylglyoxal and sodium 3-mercaptopropanesulfonate derivatization.

82 Figure S12.

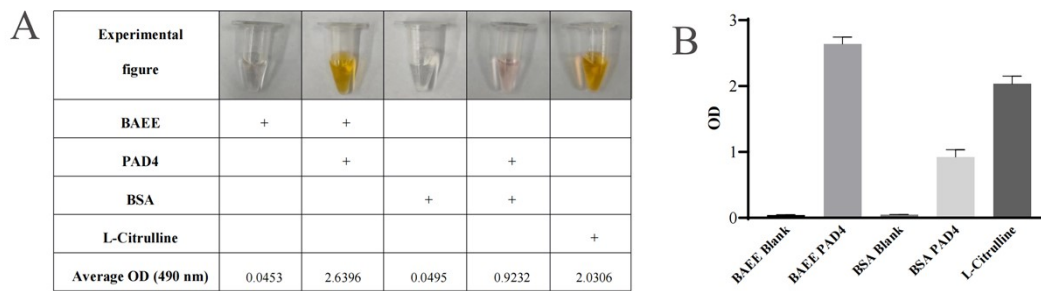

83

84 Figure S12. Qualitative and quantitative analysis of PAD4-catalyzed citrullination via  
85 COLDER assay. (A) Experimental grouping and tabulation of average optical density  
86 (OD) values at 490 nm, paired with visual colorimetric reaction results for each sample.  
87 BAEE was used as a small-molecule substrate for PAD4, BSA as the protein substrate,  
88 and L-citrulline as a positive control for the color-developing reagent. (B) Quantitative  
89 bar graph of OD values at 490 nm for all samples, confirming PAD4 enzymatic activity  
90 toward both BAEE and BSA.

91 Figure S13.

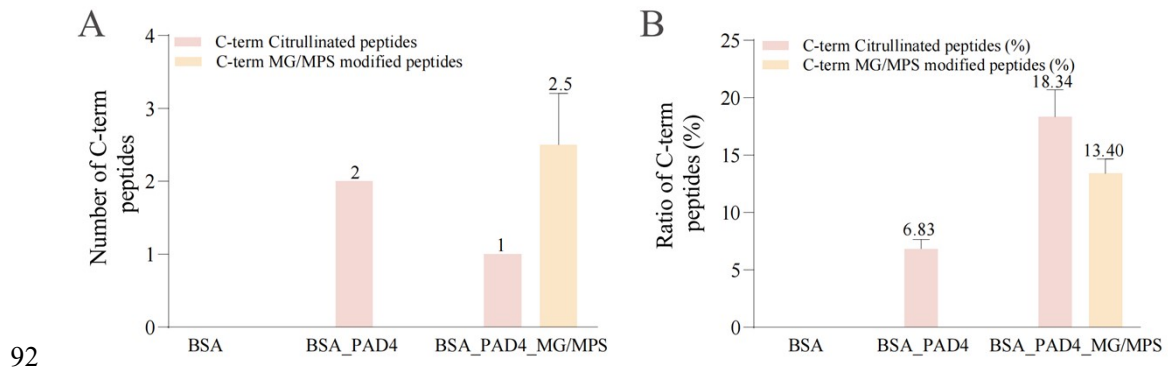

92  
93 Figure S13. Analysis of C-terminal citrullinated and MG/MPS-modified peptides in  
94 three experimental groups. (A) Bar chart showing the number of C-terminal  
95 citrullinated peptides and C-terminal MG/MPS modified peptides across three  
96 experimental groups (BSA, BSA\_PAD4, BSA\_PAD4\_MG/MPS). (B) Bar chart  
97 displaying the percentage ratio of C-terminal citrullinated peptides and C-terminal  
98 MG/MPS modified peptides relative to total identified peptides across three  
99 experimental groups (BSA, BSA\_PAD4, BSA\_PAD4\_MG/MPS).

100 Figure S14.

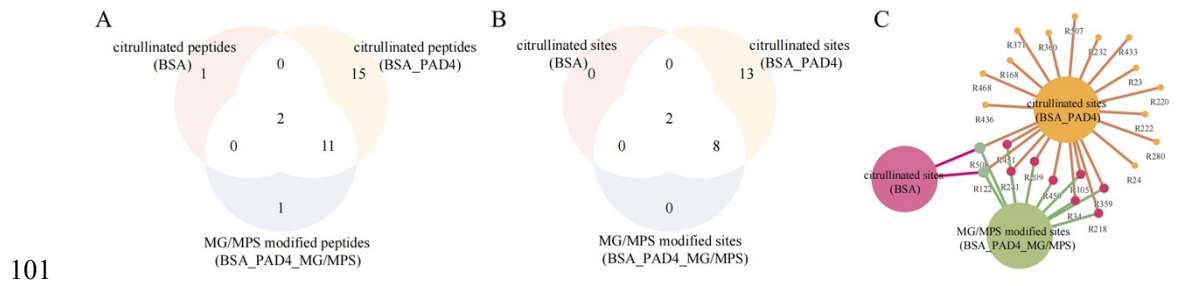

101

102 Figure S14. Overlap analysis of citrullinated peptides and modification sites in BSA

103 samples. (A) Venn diagram showing the overlap of modified peptides identified across

104 the three experimental groups. (B) Venn diagram illustrating the overlap of

105 citrullination modification sites identified across the three experimental groups. (C)

106 Network visualization of citrullinated modification sites identified in BSA samples

107 across the three experimental groups.

108 Figure S15.

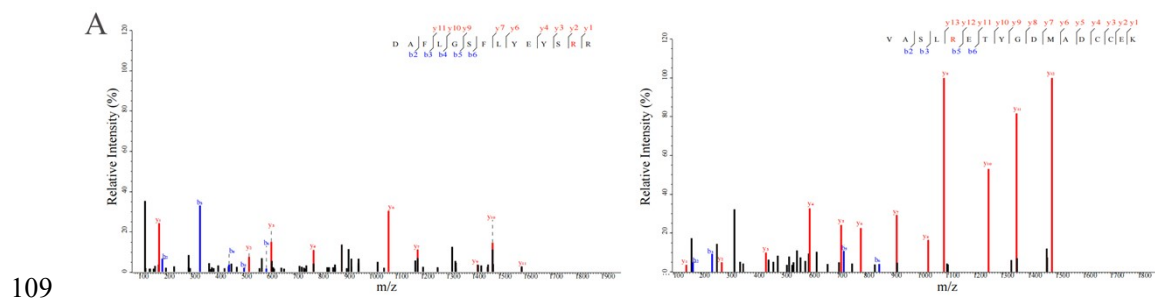

110 Figure S15. Representative MS/MS spectra of identified MG/MPS-modified  
111 citrullinated peptides.
